# Supplementary material
Source: PubMed Central journal article supplement (PMC2900327)
Supplement: 092119_2.pdf [file 092119_2.pdf]

**Appendix 2 (as supplied by the authors). Quality assessment of the 10 included studies prospectively validating the TIMI Risk Score in Emergency Department Patients.**

| Criterion                                                                                                                             | Author, year, (Ref.)     |                              |                           |                                    |                          |                          |                               |                             |                             |                          |
|---------------------------------------------------------------------------------------------------------------------------------------|--------------------------|------------------------------|---------------------------|------------------------------------|--------------------------|--------------------------|-------------------------------|-----------------------------|-----------------------------|--------------------------|
|                                                                                                                                       | Body, 2009 <sup>20</sup> | Campbell, 2009 <sup>18</sup> | Conti, 2005 <sup>14</sup> | García Almagro, 2005 <sup>15</sup> | Hess, 2010 <sup>16</sup> | Lyon, 2007 <sup>22</sup> | Pelliccia, 2006 <sup>17</sup> | Pollack, 2006 <sup>19</sup> | Sanchis, 2005 <sup>21</sup> | Tong, 2005 <sup>23</sup> |
| 1. Were the patients selected in an unbiased fashion (consecutive or random sample)?                                                  | Y                        | Y                            | Y                         | Y                                  | Y                        | Y                        | Y                             | Y                           | Y                           | Y                        |
| 2. Do they represent a wide spectrum of the severity of disease (representative of all patients at that site with a given condition)? | Y                        | Y                            | Y                         | Y                                  | Y                        | Y                        | Y                             | Y                           | Y                           | Y                        |
| 3. Were the predictor variables assessed without knowledge of the outcome?                                                            | Y                        | Y                            | Y                         | Y                                  | Y                        | Y                        | Y                             | Y                           | Y                           | Y                        |
| 4. Was the outcome assessed blindly (without knowledge of the predictor variables)?                                                   | NR                       | NR                           | NR                        | NR                                 | Y                        | NR                       | NR                            | NR                          | NR                          | NR                       |
| 5. Were the outcomes defined accurately (especially MI)?                                                                              | Y                        | Y                            | Y                         | N                                  | Y                        | NR                       | NR                            | Y                           | Y                           | Y                        |
| 6. Was there an explicit interpretation of the risk score by clinicians in practice without knowledge of the outcome?                 | N                        | Y                            | N                         | N                                  | N                        | N                        | Y                             | Y                           | N                           | N                        |
| 7. Was follow-up adequate* (<10% lost to follow-up)?                                                                                  | Y                        | Y                            | NR                        | Y                                  | Y                        | Y                        | NR                            | Y                           | Y                           | Y                        |

Y, yes; N, no; NR, not reported.

\*Based on a consensus among investigators, we arbitrarily defined adequate follow-up as a lost to follow-up rate of < 10%. The percentage of patients lost to follow-up in each study is shown in Table 1.
