# Supplementary material
Source: PubMed Central journal article supplement (PMC2900327)
Supplement: 092119_3.pdf [file 092119_3.pdf]

**Appendix 3 (as supplied by the authors). Number of patients and frequency of cardiac events in each stratum of the TIMI Risk Score for 15,660 patients in the 8 studies included in the quantitative synthesis.**

| <i>Author, year (ref.)</i>   | <i>0</i>    |                       | <i>1</i>    |                       | <i>2</i>    |                       | <i>3</i>    |                       | <i>4</i>    |                       | <i>≥5</i>   |                       |
|------------------------------|-------------|-----------------------|-------------|-----------------------|-------------|-----------------------|-------------|-----------------------|-------------|-----------------------|-------------|-----------------------|
|                              | No. of Pts. | No. of Outcomes n (%) | No. of Pts. | No. of Outcomes n (%) | No. of Pts. | No. of Outcomes n (%) | No. of Pts. | No. of Outcomes n (%) | No. of Pts. | No. of Outcomes n (%) | No. of Pts. | No. of Outcomes n (%) |
| Body 2009 <sup>20</sup>      | 59          | 1 (1.7)               | 176         | 3 (1.7)               | 143         | 15 (10.5)             | 169         | 45 (26.6)             | 134         | 29 (21.6)             | 115         | 30 (38.3)             |
| Campbell 2009 <sup>18</sup>  | 980         | 24 (2.5)              | 828         | 38 (4.6)              | 580         | 45 (7.8)              | 348         | 47 (13.5)             | 223         | 51 (22.9)             | 69          | 24 (34.8)             |
| Hess 2010 <sup>16</sup>      | 217         | 4 (1.8)               | 300         | 9 (3.0)               | 214         | 24 (11.2)             | 187         | 45 (24.1)             | 73          | 23 (31.5)             | 26          | 12 (46.2)             |
| Lyon 2007 <sup>22</sup>      | 231         | 0 (0)                 | 215         | 15 (7.0)              | 184         | 24 (13.0)             | 167         | 40 (24.0)             | 96          | 23 (24.0)             | 61          | 35 (57.4)             |
| Pelliccia 2006 <sup>17</sup> | 380         | 3(0.8)                | 650         | 14 (2.2)              | 717         | 44 (6.1)              | 888         | 193 (21.7)            | 1027        | 319 (31.1)            | 671         | 533 (79.4)            |
| Pollack 2006 <sup>19</sup>   | 1388        | 29 (2.1)              | 1133        | 57 (5.0)              | 607         | 61 (10.1)             | 447         | 87 (19.5)             | 231         | 51 (22.1)             | 123         | 50 (40.7)             |
| Sanchis 2005 <sup>21</sup>   | 19          | 0 (0)                 | 147         | 4 (2.7)               | 195         | 11 (5.6)              | 152         | 10 (6.6)              | 102         | 9 (8.8)               | 31          | 8 (25.8)              |
| Tong 2005 <sup>23</sup>      | 155         | 1 (0.7)               | 183         | 4 (2.2)               | 222         | 13 (5.7)              | 173         | 20 (11.6)             | 132         | 25 (18.9)             | 92          | 35 (38)               |

|       |      |          |      |           |      |           |      |            |      |            |      |            |
|-------|------|----------|------|-----------|------|-----------|------|------------|------|------------|------|------------|
| Total | 3429 | 62 (1.8) | 3632 | 144 (4.0) | 2862 | 237 (8.3) | 2531 | 487 (19.2) | 2018 | 530 (26.3) | 1188 | 727 (61.2) |
|-------|------|----------|------|-----------|------|-----------|------|------------|------|------------|------|------------|

## References

1. Body R, Carley S, McDowell G, et al. Can a modified thrombolysis in myocardial infarction risk score outperform the original for risk stratifying emergency department patients with chest pain? *Emerg Med J* 2009;26:95-9.
2. Campbell CF, Chang AM, Sease KL, et al. Combining thrombolysis in myocardial infarction risk score and clear-cut alternative diagnosis for chest pain risk stratification. *Am J Emerg Med* 2009;27:37-42.
3. Hess EP, Perry JJ, Calder LA, et al. Prospective validation of a modified thrombolysis in myocardial infarction risk score in emergency department patients with chest pain and possible acute coronary syndrome. *Acad Emerg Med*. In press.
4. Lyon R, Morris AC, Caesar D, et al. Chest pain presenting to the emergency department-to stratify risk with GRACE or TIMI? *Resuscitation* 2007;74:90-3.
5. Pelliccia F, Salvini P, Cartoni D, et al. Frequency and clinical correlates of changes in thrombolysis in myocardial infarction risk score during observation period at emergency department in "low-risk" patients with acute chest pain. *Am J Cardiol* 2006;97:781-4.
6. Pollack CV Jr, Sites FD, Shofer FS, et al. Application of the TIMI risk score for unstable angina and non-ST elevation acute coronary syndrome to an unselected emergency department chest pain population. *Acad Emerg Med* 2006;13:13-8.
7. Sanchis J, Bodi V, Nunez J, et al. New risk score for patients with acute chest pain, non-ST-segment deviation, and normal troponin concentrations: a comparison with the TIMI risk score. *J Am Coll Cardiol* 2005;46:443-9.
8. Tong KL, Kaul S, Wang XQ, et al. Myocardial contrast echocardiography versus thrombolysis in myocardial infarction score in patients presenting to the emergency department with chest pain and a nondiagnostic electrocardiogram. *J Am Coll Cardiol* 2005;46:920-7.
